# Supplementary material for: Persistence of Chronic Lymphocytic Leukemia Stem-like Populations under Simultaneous In Vitro Treatment with Curcumin, Fludarabine, and Ibrutinib: Implications for Therapy Resistance
Source: MDPI journal article supplement (doi:10.3390/ijms25041994), 2024-02-07
Supplement: s1 [file s1]

## Supplemental Materials

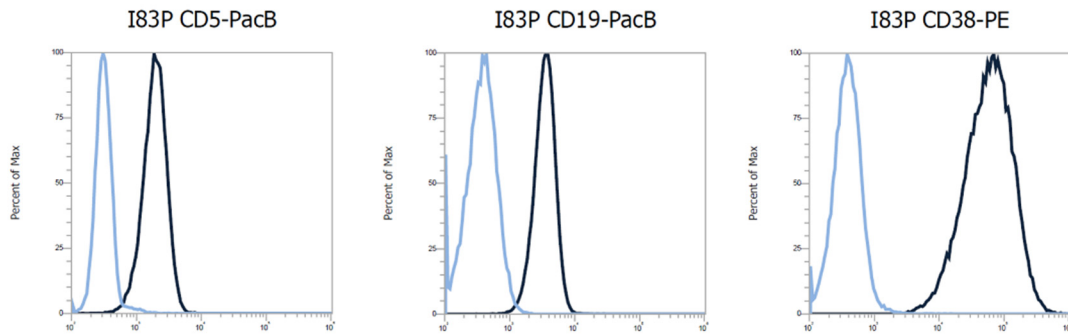

**Figure S1.** Immunophenotyping of I83 cells. Immunophenotyping showed that both populations, diploid and tetraploid, were positive for CD5, CD19, and CD38.

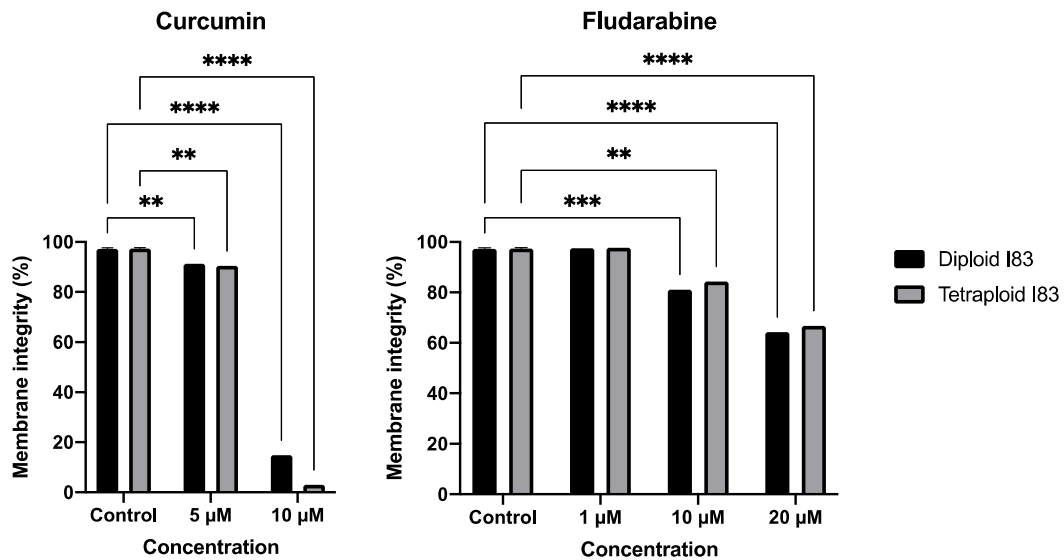

**Figure S2.** Comparative analysis of sensitivity of diploid and tetraploid I83 to curcumin and fludarabine. Diploid and tetraploid I83 cells were incubated for 72 h at 37°C and 5% CO<sub>2</sub> with different curcumin (5 μM and 10 μM) and fludarabine (1 μM, 10 μM and 20 μM) concentrations. Curcumin and fludarabine produced similar effects on cell membrane integrity of diploid and tetraploid I83. Comparing control cells with cells treated with various concentrations of curcumin and fludarabine, significant differences in membrane integrity were observed in both diploid and tetraploid I83 cell populations. \*  $P < 0.05$ ; \*\*  $P < 0.01$ ; \*\*\*  $P < 0.001$ ; \*\*\*\*  $P < 0.0001$ .

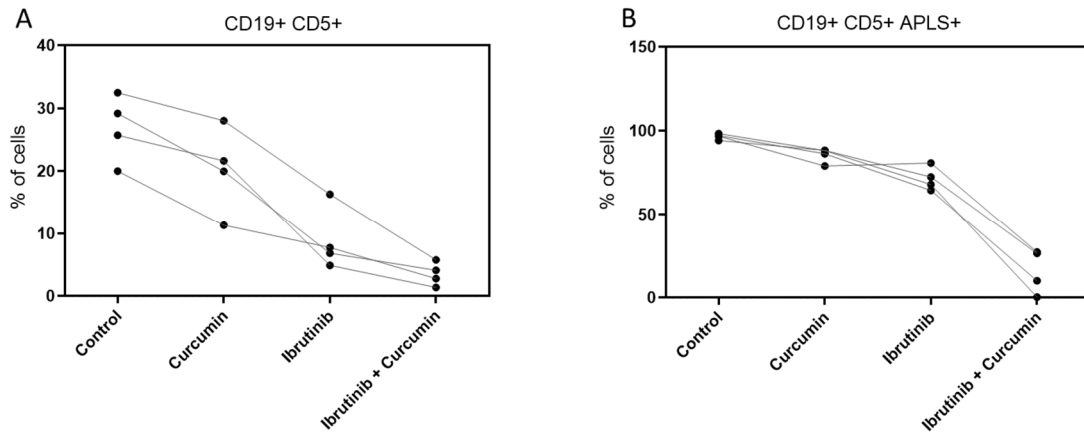

**Figure S3.** Curcumin synergistic effect combined with ibrutinib in P4 follow-ups. (a) Progressive reduction of CD19 CD5 cells was observed at every follow-up. Response to curcumin and ibrutinib of the cells was maintained, achieving in all cases similar effects. (b) No changes were observed for CD19 CD5 APLS cells along the treatment. For all follow-ups, response rates were consistently high near 100%, and the response to ibrutinib and curcumin was remarkably similar. However, no significant effects were observed due to the reduced sample size.

**Table S1.** Curcumin and drug effects on primary cell cultures.

| Patient     | Treatment   | % of cells |              |                     | Incubation time |
|-------------|-------------|------------|--------------|---------------------|-----------------|
|             |             | PI -       | CD5 + CD19 + | CD5 + CD19 + APLS + |                 |
| FLUDARABINE |             |            |              |                     |                 |
| P5          | Control     | 13,081     | 30,703       | 74,046              | 72h             |
|             | Curcumin    | 10,87      | 33,003       | 70,155              |                 |
|             | Drug        | 5,497      | 60,788       | 42,473              |                 |
|             | Combination | 4,393      | 43,076       | 39,666              |                 |
| P6          | Control     | 22,657     | 67,293       | 43,267              | 72h             |
|             | Curcumin    | 21,542     | 64,51        | 43,142              |                 |
|             | Drug        | 10,506     | 64,791       | 19,178              |                 |
|             | Combination | 11,654     | 64,256       | 13,743              |                 |
|             | Control     | 27,974     | 79,988       | 93,843              | 96h             |
|             | Curcumin    | 32,889     | 11,304       | 86,317              |                 |
|             | Drug        | 2,364      | 61,327       | 20,483              |                 |
|             | Combination | 3,455      | 62,408       | 10,945              |                 |
| P7          | Control     | 63,678     | 96,975       | 96,609              | 96h             |
|             | Curcumin    | 48,452     | 97,387       | 93,463              |                 |
|             | Drug        | 14,702     | 97,954       | 79,674              |                 |
|             | Combination | 16,818     | 96,441       | 67,742              |                 |
| P8          | Control     | 46,378     | 70,509       | 97,801              | 72h             |
|             | Curcumin    | 41,682     | 66,942       | 96,602              |                 |
|             | Drug        | 12,94      | 67,449       | 83,632              |                 |
|             | Combination | 9,127      | 57,341       | 72,459              |                 |
| P12         | Control     | 33,385     | 45,241       | 38,047              | 72h             |
|             | Curcumin    | 11,495     | 22,923       | 75                  |                 |

|     |             |        |        |        |      |
|-----|-------------|--------|--------|--------|------|
|     | Drug        | 5,507  | 41,805 | 45,083 |      |
|     | Combination | 2,255  | 32,929 | 35,787 |      |
| P13 | Control     | 57,348 | 59,767 | 99,172 | 72h  |
|     | Curcumin    | 37,935 | 60,562 | 96,856 |      |
|     | Drug        | 3,329  | 12,416 | 64,315 |      |
|     | Combination | 1,762  | 18,149 | 68,627 |      |
| P15 | Control     | 44,266 | 77,997 | 91,864 | 48h  |
|     | Curcumin    | 30,265 | 76,302 | 93,805 |      |
|     | Drug        | 33,546 | 73,229 | 85,167 |      |
|     | Combination | 17,466 | 74,16  | 91,169 |      |
| P16 | Control     | 48,667 | 87,332 | 97,204 | 96h  |
|     | Curcumin    | 37,675 | 84,834 | 96,177 |      |
|     | Drug        | 1,194  | 39,167 | 32,367 |      |
|     | Combination | 0,905  | 35,861 | 25,551 |      |
| P17 | Control     | 44,603 | 81,727 | 94,852 | 96h  |
|     | Curcumin    | 24,977 | 77,387 | 86,477 |      |
|     | Drug        | 2,039  | 72,035 | 47,001 |      |
|     | Combination | 1,353  | 72,874 | 26,157 |      |
| P18 | Control     | 67,087 | 94,835 | 92,785 | 72h  |
|     | Curcumin    | 63,071 | 94,312 | 94,349 |      |
|     | Drug        | 17,306 | 91,597 | 67,822 |      |
|     | Combination | 17,711 | 91,724 | 73,777 |      |
|     | Control     | 60,959 | 95,541 | 97,979 | 144h |
|     | Curcumin    | 58,74  | 96,439 | 96,498 |      |
|     | Drug        | 0,716  | 95,652 | 3,283  |      |
|     | Combination | 1,248  | 93,137 | 1,404  |      |
| P19 | Control     | 69,397 | 77,761 | 98,043 | 72h  |
|     | Curcumin    | 61,818 | 73,382 | 96,04  |      |
|     | Drug        | 5,167  | 51,515 | 44,949 |      |
|     | Combination | 2,385  | 55,625 | 2,697  |      |
| P20 | Control     | 33,14  | 82,391 | 84,589 | 96h  |
|     | Curcumin    | 30,985 | 80,422 | 94,741 |      |
|     | Drug        | 2,744  | 77,168 | 68,921 |      |
|     | Combination | 1,926  | 77,157 | 58,26  |      |
| P21 | Control     | 50,947 | 92,191 | 81,563 | 48h  |
|     | Curcumin    | 51,022 | 92,62  | 83,4   |      |
|     | Drug        | 35,535 | 90,207 | 64,903 |      |
|     | Combination | 23,555 | 92,459 | 57,9   |      |
|     | Control     | 39,945 | 91,881 | 96,28  | 144h |
|     | Curcumin    | 35,178 | 93,212 | 91,618 |      |
|     | Drug        | 4,526  | 92,798 | 0,636  |      |
|     | Combination | 4,417  | 94,251 | 0,452  |      |
| P22 | Control     | 55,947 | 74,07  | 51,455 | 48h  |
|     | Curcumin    | 54,908 | 83,161 | 63,089 |      |
|     | Drug        | 53,028 | 85,681 | 33,718 |      |
|     | Combination | 52,081 | 86,97  | 42,761 | 144h |
|     | Control     | 28,076 | 54,709 | 92,436 |      |
|     | Curcumin    | 24,895 | 77,647 | 92,296 |      |
|     | Drug        | 0,388  | 66,111 | 3,361  |      |

|             |             |        |        |        |      |
|-------------|-------------|--------|--------|--------|------|
|             | Combination | 0,224  | 62,252 | 8,511  |      |
| P23         | Control     | 58,471 | 66,842 | 98,659 | 72h  |
|             | Curcumin    | 38,418 | 63,693 | 95,568 |      |
|             | Drug        | 1,677  | 30,173 | 30,743 |      |
|             | Combination | 1,167  | 29,709 | 12,887 |      |
| P25         | Control     | 43,492 | 92,383 | 21,826 | 96h  |
|             | Curcumin    | 20,998 | 70,605 | 89,436 |      |
|             | Drug        | 2,325  | 87,308 | 13,774 |      |
|             | Combination | 2,274  | 81,276 | 5,248  |      |
| IBRUTINIB   |             |        |        |        |      |
| P1          | Control     | 48,382 | 1,246  | 96,154 | 96h  |
|             | Curcumin    | 30,323 | 2,356  | 96     |      |
|             | Drug        | 29,156 | 1,418  | 88,732 |      |
|             | Combination | 12,372 | 0,987  | 60     |      |
| P4          | Control     | 68,43  | 32,484 | 94,25  | 72h  |
|             | Curcumin    | 44,955 | 28,034 | 88,361 |      |
|             | Drug        | 50,573 | 16,311 | 72,428 |      |
|             | Combination | 21,699 | 5,766  | 26,446 |      |
|             | Control     | 54,008 | 29,178 | 98,354 | 96h  |
|             | Curcumin    | 28,572 | 19,976 | 88,254 |      |
|             | Drug        | 32,717 | 6,836  | 68,008 |      |
|             | Combination | 9,837  | 4,097  | 0,289  |      |
|             | Control     | 35,711 | 25,736 | 96,822 | 96h  |
|             | Curcumin    | 14,903 | 21,636 | 79,063 |      |
|             | Drug        | 18,516 | 4,893  | 80,886 |      |
|             | Combination | 7,089  | 1,359  | 27,273 |      |
| Control     | 51,938      | 20,011 | 97,231 | 96h    |      |
| Curcumin    | 32,889      | 11,304 | 86,317 |        |      |
| Drug        | 33,587      | 7,725  | 64,498 |        |      |
| Combination | 8,983       | 2,765  | 10,084 |        |      |
| P9          | Control     | 29,975 | 28,385 | 96,563 | 120h |
|             | Curcumin    | 12,085 | 14,43  | 51,401 |      |
|             | Drug        | 6,691  | 10,731 | 62,571 |      |
|             | Combination | 1,464  | 20,256 | 9,091  |      |
| P10         | Control     | 37,289 | 3,323  | 92,661 | 120h |
|             | Curcumin    | 12,622 | 2,829  | 82,857 |      |
|             | Drug        | 14,47  | 1,24   | 7,692  |      |
|             | Combination | 4,495  | 1,064  | 0      |      |
| P24         | Control     | 51,483 | 30,29  | 98,658 | 120h |
|             | Curcumin    | 47,092 | 13,207 | 96,985 |      |
|             | Drug        | 22,27  | 4,587  | 58,621 |      |
|             | Combination | 5,084  | 5,975  | 20,69  |      |
| RITUXIMAB   |             |        |        |        |      |
| P2          | Control     | 33,975 | 0,497  | 100    | 96h  |
|             | Curcumin    | 16,82  | 0,158  | 100    |      |
|             | Drug        | 11,649 | 0,895  | 0      |      |
|             | Combination | 14,125 | 0,699  | 100    |      |
| P3          | Control     | 53,805 | 31,872 | 91,704 | 96h  |
|             | Curcumin    | 33,601 | 22,767 | 85,802 |      |

|            |             |        |        |        |      |
|------------|-------------|--------|--------|--------|------|
|            | Drug        | 54,086 | 31,919 | 90,422 |      |
|            | Combination | 31,829 | 21,345 | 81,922 |      |
| P7         | Control     | 63,678 | 96,975 | 96,609 | 96h  |
|            | Curcumin    | 48,452 | 97,387 | 93,463 |      |
|            | Drug        | 57,613 | 98,761 | 94,145 |      |
|            | Combination | 51,634 | 97,098 | 65,606 |      |
| P11        | Control     | 33,425 | 43,738 | 91,773 | 120h |
|            | Curcumin    | 13,835 | 44,055 | 88,494 |      |
|            | Drug        | 34,304 | 41,898 | 84,178 |      |
|            | Combination | 10,739 | 44,776 | 79,371 |      |
| P17        | Control     | 44,603 | 81,727 | 94,852 | 96h  |
|            | Curcumin    | 24,977 | 77,387 | 86,477 |      |
|            | Drug        | 49,654 | 81,71  | 56,342 |      |
|            | Combination | 30,841 | 80,646 | 87,836 |      |
| VENETOCLAX |             |        |        |        |      |
| P14        | Control     | 27,186 | 11,503 | 71,875 | 120h |
|            | Curcumin    | 9,711  | 9,018  | 73,387 |      |
|            | Drug        | 1,582  | 21,277 | 1,111  |      |
|            | Combination | 1,243  | 29,412 | 1      |      |
